# Supplementary material
Source: Springer Nature journal article supplement (https://www.springermedizin.de/resource/supplementary/12985_2010_859_MOESM2_ESM.pdf/9608606)

A

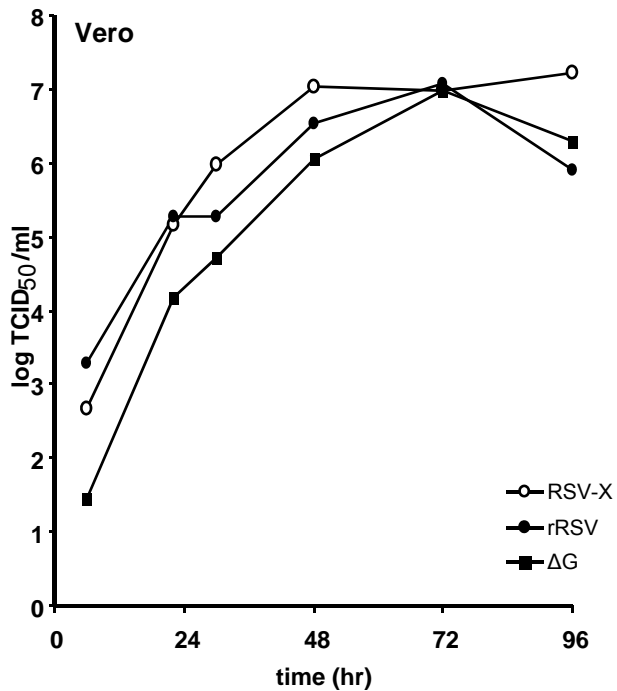

B

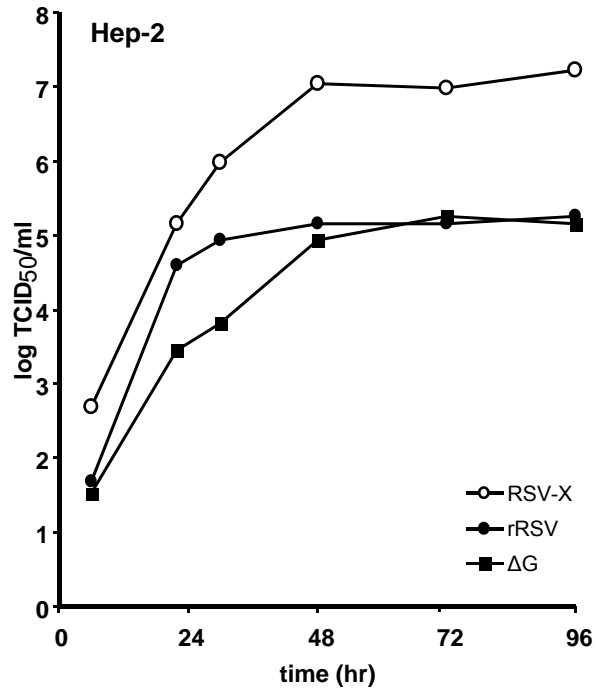

Supplement: MOESM2 [file 9608606]
